# Supplementary material
Source: PubMed Central journal article supplement (PMC4999572)

## SUPPLEMENTARY MATERIAL

**Fig. S1 Chronological change in representative variables among clinical parameters and serum trough level of infliximab and serum levels of cytokines during infliximab treatment.** Values at baseline and at 3 months, 6 months, and 1 year are shown as median, interquartile range, and 95th percentile of (A) DAS28-ESR, (B) CDAI, (C) MMP-3 (ng/ml), (D) ESR (mm/hour), (E) serum trough level of IFX (ug/ml), and (F) serum level of IL-6 (pg/ml). *P* values are indicated among the four groups. *CDAI* Clinical Disease Activity Index, *DAS28* Disease Activity Score 28, *ESR* Erythrocyte sedimentation rate, *IFX* Infliximab, *IL* Interleukin, *MMP-3* Matrix metalloproteinase-3.

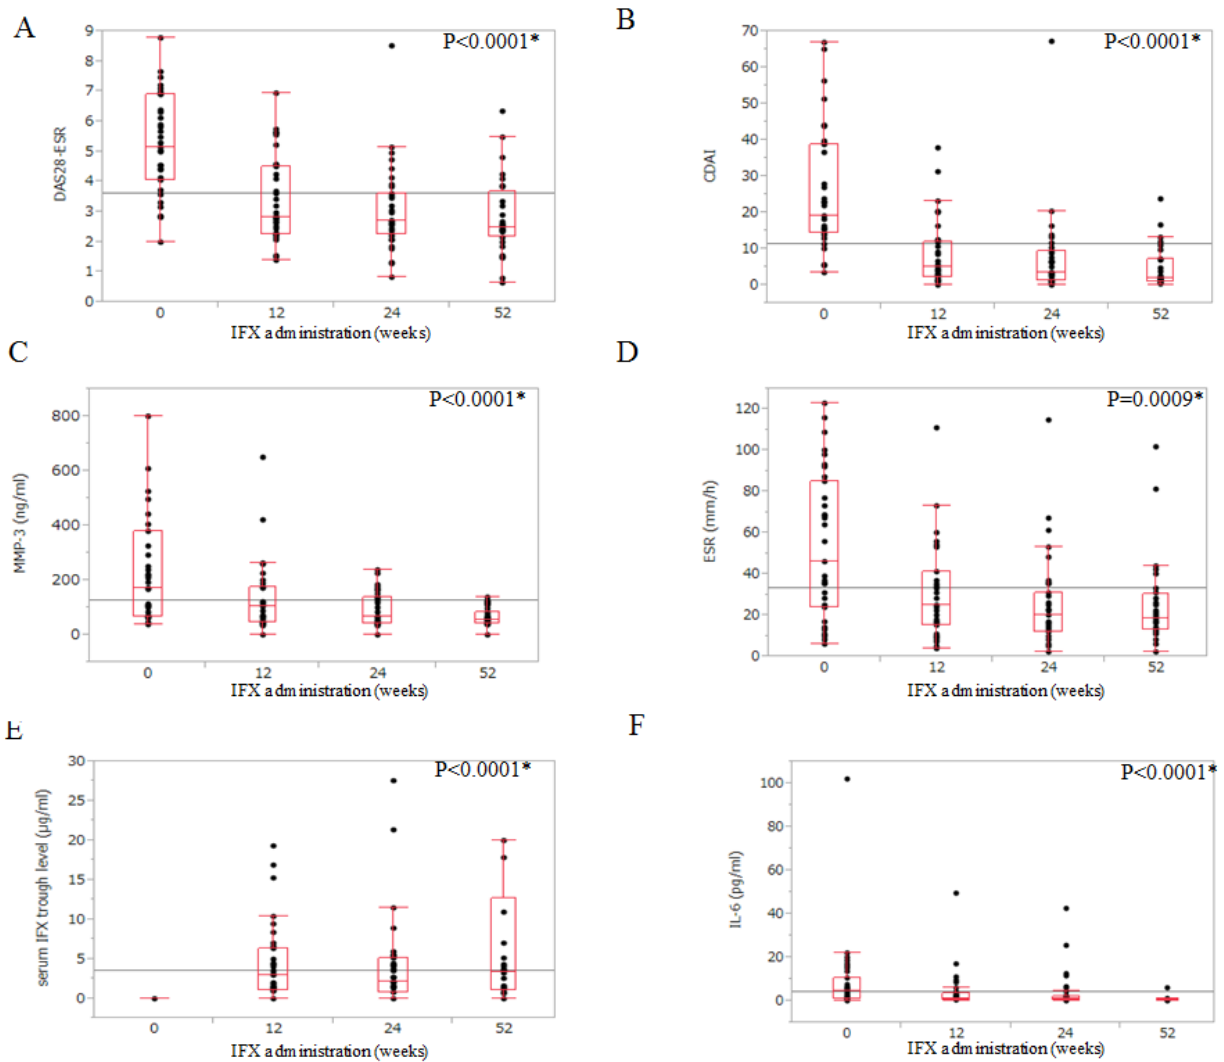

Supplement: 40744_2015_22_MOESM1_ESM.pdf [file 40744_2015_22_MOESM1_ESM.pdf]
